# Supplementary material
Source: PubMed Central journal article supplement (PMC1890522)
Supplement: pnas_0608842104_5.pdf [file pnas_0608842104_5.pdf]

# SI Data Set

## Market Summary Statistics

| MKT # | Mkt           | Mkt Description                                           | total period return | mean return | volatility (standard finance) | std monthly returns | max ret | min ret |
|-------|---------------|-----------------------------------------------------------|---------------------|-------------|-------------------------------|---------------------|---------|---------|
| 1     | 10yr 1998     | 10 YR. U.S. Treasury Bond Yield 07/17/98-11/03/00;        | 10.84%              | 0.19%       | 0.13                          | 0.04                | 6.98%   | -8.32%  |
| 3     | Dow 1929      | Dow Jones Industrials Average 07/26/27-11/12/29           | -1.75%              | 0.51%       | 0.45                          | 0.13                | 9.77%   | -50.41% |
| 5     | Nikkei 1990   | Nikkei 225 Index 01/05/00-04/24/02                        | -21.65%             | -2.60%      | 0.18                          | 0.05                | 11.13%  | -11.28% |
| 7     | Dow 1971      | Dow Jones Industrial Average 04/06/71- 7/24/73            | 0.73%               | 0.02%       | 0.13                          | 0.04                | 7.95%   | -6.63%  |
| 9     | DM/\$1983     | Deutsche Mark/U.S Dollar Exchange Rate 8/12/83 – 11/29/85 | -9.52%              | -0.27%      | 0.16                          | 0.05                | 6.78%   | -10.68% |
| 11    | NASDAQ 1998   | NASDAQ Composite Index 9/11/98 – 12/29/00                 | -3.62%              | 1.36%       | 0.47                          | 0.14                | 16.63%  | -30.90% |
| 13    | Yen/\$1990    | Yen/U.S. Dollar Exchange Rate 06/15/90 – 10/2/92          | -13.01%             | -0.85%      | 0.08                          | 0.02                | 4.20%   | -4.60%  |
| 15    | S&P500 2001   | S&P500 Index 09/07/2001-12/26/2003                        | 8.80%               | 0.03%       | 0.18                          | 0.05                | 11.81%  | -11.03% |
| 17    | \$/Euro 2001  | U.S.Dollar/Euro Exchange Rate 1/8/99-4/27/01              | 23.84%              | 1.04%       | 0.09                          | 0.03                | 6.72%   | -4.49%  |
| 19    | HangSeng 1992 | Hang Seng Index 09/11/92 – 12/30/94                       | 36.14%              | 2.06%       | 0.19                          | 0.06                | 8.56%   | -8.81%  |
| 0     | S&P500 1987   | S&P 500 Index 7/19/85 – 11/06/87                          | 3.35%               | 0.83%       | 0.24                          | 0.07                | 10.63%  | -21.69% |
| 2     | Nikkei 1986   | Nikkei 225 Index 10/17/86-02/03/89                        | 32.34%              | 2.13%       | 0.18                          | 0.05                | 7.98%   | -16.09% |
| 4     | Bovespa 1997  | Bovespa Index 06/20/97-10/08/99                           | -3.70%              | -2.60%      | 0.59                          | 0.17                | 22.97%  | -48.23% |
| 6     | S&P500 1990   | S&P500 Index 03/02/90 – 06/19/92                          | 23.16%              | 0.62%       | 0.12                          | 0.04                | 10.09%  | -3.57%  |
| 8     | Dow 2001      | Dow Jones Industrial Average 03/16/01 – 07/04/03          | -7.62%              | -0.83%      | 0.22                          | 0.06                | 14.78%  | -10.88% |
| 10    | Yen/\$ 2000   | Yen/U.S. Dollar Exchange Rate 11/17/00-03/07/03           | -3.05%              | 0.23%       | 0.10                          | 0.03                | 3.80%   | -4.99%  |
| 12    | \$/Euro 1999  | U.S.Dollar/Euro Exchange Rate 1/8/99-4/27/01              | -18.03%             | -0.86%      | 0.12                          | 0.03                | 7.59%   | -6.02%  |
| 14    | Yen/\$ 1996   | Yen/U.S. Dollar Exchange Rate 7/12/96 – 10/30/98          | -7.49%              | -0.85%      | 0.19                          | 0.05                | 7.16%   | -15.22% |
| 16    | HangSeng 1996 | Hang Seng Index 11/10/95-02/27/98                         | 2.73%               | 0.66%       | 0.40                          | 0.12                | 21.58%  | -34.54% |
| 18    | 10Yr 1993     | 10 YR. U.S. Treasury Yield 05/14.93-08/25/95              | 8.50%               | 0.19%       | 0.17                          | 0.05                | 9.41%   | -9.23%  |

## Subject Performance Summary by Market

| MKT # | Mkt           | mean subject return | stddev |
|-------|---------------|---------------------|--------|
| 1     | 10yr 1998     | 5.97%               | 0.03   |
| 3     | Dow 1929      | 2.06%               | 0.12   |
| 5     | Nikkei 1990   | -5.91%              | 0.07   |
| 7     | Dow 1971      | -1.65%              | 0.06   |
| 9     | DM/\$1983     | -4.74%              | 0.04   |
| 11    | NASDAQ 1998   | 2.24%               | 0.13   |
| 13    | Yen/\$1990    | -5.98%              | 0.04   |
| 15    | S&P500 2001   | 5.59%               | 0.06   |
| 17    | \$/Euro 2001  | 12.58%              | 0.06   |
| 19    | HangSeng 1992 | 18.54%              | 0.09   |
| 0     | S&P500 1987   | 3.22%               | 0.07   |
| 2     | Nikkei 1986   | 12.82%              | 0.07   |
| 4     | Bovespa 1997  | -7.71%              | 0.13   |
| 6     | S&P500 1990   | 9.31%               | 0.06   |
| 8     | Dow 2001      | -3.15%              | 0.06   |
| 10    | Yen/\$ 2000   | 0.21%               | 0.03   |
| 12    | \$/Euro 1999  | -8.79%              | 0.04   |
| 14    | Yen/\$ 1996   | -3.11%              | 0.05   |
| 16    | HangSeng 1996 | 10.74%              | 0.10   |
| 18    | 10Yr 1993     | 7.78%               | 0.07   |

|         |         | Returns |        |        |        |        |        |        |        |        |       |                    |                     |                         |
|---------|---------|---------|--------|--------|--------|--------|--------|--------|--------|--------|-------|--------------------|---------------------|-------------------------|
|         |         | MKT     | 1      | 3      | 5      | 7      | 9      | 11     | 13     | 15     | 17    | 19                 | Total               | Total Return By Subject |
| SUBJ    | 1       | 2.0%    | 1.0%   | 2.0%   | -5.3%  | -4.0%  | -5.6%  | -6.5%  | 7.0%   | 7.6%   | 12.4% | 1.09               | 9%                  |                         |
|         | 2       | 7.2%    | 13.6%  | -12.0% | -1.7%  | -1.0%  | 15.3%  | -12.5% | 16.8%  | 21.2%  | 18.1% | 1.76               | 76%                 |                         |
|         | 3       | 2.2%    | 2.0%   | -10.8% | 2.2%   | -5.8%  | -8.0%  | -10.2% | 9.1%   | 4.2%   | 13.0% | 0.95               | -5%                 |                         |
|         | 4       | 9.0%    | 7.4%   | -8.3%  | 3.0%   | -9.2%  | 0.0%   | -5.9%  | -0.8%  | 14.6%  | 10.8% | 1.19               | 19%                 |                         |
|         | 5       | 5.9%    | -3.5%  | 0.0%   | 0.8%   | -1.6%  | 8.8%   | -1.8%  | 2.0%   | 16.7%  | 27.2% | 1.64               | 64%                 |                         |
|         | 6       | 7.4%    | 2.2%   | -10.8% | -0.9%  | -6.4%  | 3.9%   | -9.5%  | 6.0%   | 17.2%  | 23.6% | 1.31               | 31%                 |                         |
|         | 9       | 2.0%    | 19.6%  | -2.0%  | 0.0%   | -6.9%  | 19.1%  | -4.9%  | 1.0%   | 10.3%  | 6.7%  | 1.50               | 50%                 |                         |
|         | 12      | 2.6%    | 0.8%   | -9.8%  | -11.5% | -4.0%  | 7.6%   | -1.0%  | 7.1%   | 16.8%  | 28.8% | 1.36               | 36%                 |                         |
|         | 14      | 8.9%    | 3.0%   | 0.7%   | -5.7%  | -2.9%  | 18.6%  | -0.7%  | 6.8%   | 14.6%  | 12.1% | 1.67               | 67%                 |                         |
|         | 15      | 10.3%   | -5.9%  | -8.0%  | -8.8%  | -7.9%  | -17.1% | -6.1%  | 12.6%  | 13.0%  | 34.6% | 1.07               | 7%                  |                         |
|         | 16      | 0.0%    | 0.0%   | 0.0%   | 0.0%   | -0.9%  | -3.8%  | -1.0%  | 0.0%   | 1.9%   | 4.0%  | 1.00               | 0%                  |                         |
|         | 17      | 5.1%    | 11.0%  | 1.6%   | -4.9%  | 3.2%   | 28.1%  | -9.8%  | 5.4%   | 12.2%  | 18.0% | 1.88               | 88%                 |                         |
|         | 19      | 7.1%    | -12.0% | -4.3%  | 0.0%   | -4.6%  | -4.5%  | -1.1%  | 12.1%  | 19.3%  | 24.3% | 1.35               | 35%                 |                         |
|         | 20      | 10.5%   | -1.9%  | -22.5% | -7.1%  | -7.1%  | -21.3% | -8.2%  | 17.6%  | 24.2%  | 36.0% | 1.04               | 4%                  |                         |
|         | 21      | 9.8%    | 36.7%  | -20.2% | 16.7%  | -13.0% | -15.8% | -4.4%  | -12.6% | 3.4%   | 14.3% | 1.01               | 1%                  |                         |
|         | 23      | 3.5%    | 19.0%  | -1.2%  | 3.7%   | -10.9% | -22.7% | -14.1% | 10.2%  | 19.6%  | 17.8% | 1.16               | 16%                 |                         |
|         | 26      | 10.7%   | -17.8% | -11.4% | -8.7%  | -4.3%  | 20.0%  | -8.0%  | 12.9%  | 13.5%  | 14.5% | 1.14               | 14%                 |                         |
|         | 28      | 3.4%    | 8.3%   | -10.8% | 1.9%   | -5.3%  | -0.9%  | -5.8%  | 7.0%   | 12.0%  | 22.3% | 1.32               | 32%                 |                         |
|         | 29      | 9.0%    | -1.5%  | -1.9%  | -4.6%  | 1.0%   | 2.7%   | -3.9%  | 1.8%   | 12.1%  | 16.4% | 1.33               | 33%                 |                         |
|         | 30      | 6.9%    | -3.6%  | -2.3%  | 0.9%   | -2.9%  | 8.8%   | -7.3%  | 4.0%   | 10.9%  | 18.5% | 1.36               | 36%                 |                         |
|         | 31      | 11.0%   | -7.1%  | -0.8%  | 0.8%   | -2.8%  | 23.4%  | -2.8%  | 2.3%   | 3.6%   | 4.4%  | 1.33               | 33%                 |                         |
|         | 32      | 6.8%    | 0.7%   | -9.2%  | -1.7%  | -3.7%  | -1.8%  | -8.1%  | 5.4%   | 16.5%  | 23.0% | 1.26               | 26%                 |                         |
|         | 37      | 3.8%    | -23.0% | -3.7%  | -8.6%  | -1.9%  | 15.0%  | -2.9%  | 6.7%   | 14.9%  | 17.4% | 1.11               | 11%                 |                         |
|         | 38      | 4.3%    | 2.1%   | 3.9%   | 3.8%   | -15.0% | -9.4%  | -10.6% | -3.1%  | 15.2%  | 29.3% | 1.14               | 14%                 |                         |
|         | 41      | 1.9%    | 2.8%   | -4.2%  | 0.0%   | 0.0%   | 1.0%   | -3.5%  | 5.0%   | 4.6%   | 7.1%  | 1.15               | 15%                 |                         |
|         | 43      | 5.0%    | -8.0%  | -1.2%  | -3.4%  | -8.7%  | -4.8%  | -3.5%  | 1.3%   | 4.8%   | 13.4% | 0.93               | -7%                 |                         |
|         | 46      | 7.0%    | 0.8%   | -13.7% | 0.0%   | -6.3%  | 1.9%   | -7.3%  | 6.8%   | 12.9%  | 28.1% | 1.27               | 27%                 |                         |
|         | 47      | 3.9%    | 11.0%  | -4.7%  | -6.8%  | 0.0%   | 4.0%   | -5.7%  | 6.0%   | 14.4%  | 23.1% | 1.50               | 50%                 |                         |
|         | Average |         | 6.0%   | 2.1%   | -5.9%  | -1.6%  | -4.7%  | 2.2%   | -6.0%  | 5.6%   | 12.6% | 18.5%              | Group B Avg.<br>28% |                         |
|         | STDEV   |         | 0.032  | 0.117  | 0.066  | 0.055  | 0.042  | 0.133  | 0.036  | 0.062  | 0.058 | 0.086              |                     |                         |
|         | SUBJ    | MKT     | 0      | 2      | 4      | 6      | 8      | 10     | 12     | 14     | 16    | 18                 |                     |                         |
|         |         | 7       | -1.0%  | 18.0%  | -7.0%  | 7.7%   | -5.4%  | 0.9%   | -11.4% | 1.8%   | 5.1%  | 8.5%               | 1.15                | 15%                     |
|         |         | 8       | -2.0%  | 15.2%  | -14.4% | 10.0%  | -2.7%  | -1.9%  | -5.6%  | -2.6%  | 8.7%  | 11.6%              | 1.13                | 13%                     |
|         |         | 10      | 10.8%  | 7.8%   | 2.3%   | 2.0%   | -1.4%  | 2.7%   | -5.1%  | -0.7%  | 11.2% | 1.5%               | 1.34                | 34%                     |
|         |         | 11      | 2.7%   | 4.2%   | -5.0%  | 0.0%   | -11.1% | -2.3%  | -6.3%  | -4.8%  | 35.5% | -3.5%              | 1.03                | 3%                      |
|         |         | 13      | 8.1%   | 25.7%  | -0.8%  | 21.0%  | -6.6%  | -2.5%  | -16.2% | -3.1%  | 3.1%  | 7.9%               | 1.34                | 34%                     |
|         |         | 18      | -10.7% | 12.8%  | -19.1% | 14.0%  | -2.8%  | 0.0%   | -11.3% | -7.2%  | 14.9% | 5.4%               | 0.90                | -10%                    |
|         |         | 22      | 9.0%   | 25.4%  | 2.0%   | 15.0%  | -5.2%  | -1.8%  | -14.8% | 0.0%   | 8.9%  | 4.7%               | 1.45                | 45%                     |
|         |         | 24      | -9.0%  | 6.6%   | -15.5% | 1.1%   | 2.4%   | 2.3%   | -9.6%  | -4.5%  | 7.2%  | 9.6%               | 0.88                | -12%                    |
|         |         | 25      | 0.8%   | 11.0%  | -16.5% | 9.0%   | -1.5%  | -3.3%  | -8.3%  | -7.1%  | -3.0% | 13.6%              | 0.91                | -9%                     |
|         |         | 27      | 16.1%  | 17.6%  | -27.3% | 13.9%  | -7.5%  | 2.2%   | -11.9% | -13.0% | 34.1% | 8.2%               | 1.19                | 19%                     |
|         |         | 33      | 10.9%  | 9.7%   | 1.6%   | 8.2%   | -1.0%  | -1.9%  | -13.0% | -5.3%  | 12.6% | 17.8%              | 1.42                | 42%                     |
|         |         | 34      | -5.0%  | 15.3%  | -28.8% | 15.8%  | 4.5%   | 6.4%   | -11.1% | 6.0%   | 14.7% | 7.9%               | 1.17                | 17%                     |
|         |         | 35      | 2.2%   | 14.3%  | -6.5%  | 6.9%   | -11.2% | -2.1%  | -2.0%  | -14.8% | 8.0%  | 2.7%               | 0.94                | -6%                     |
|         |         | 36      | -3.5%  | 17.3%  | -18.3% | 0.0%   | 0.0%   | 1.0%   | -5.2%  | 4.0%   | 11.0% | 6.6%               | 1.09                | 9%                      |
|         |         | 39      | -1.1%  | 17.8%  | -8.9%  | 14.2%  | -10.8% | -1.0%  | -9.1%  | -5.5%  | 12.0% | -2.9%              | 1.00                | 0%                      |
|         |         | 40      | 6.5%   | 16.5%  | 1.9%   | 11.9%  | -5.3%  | -2.0%  | -6.8%  | -2.4%  | 10.7% | 8.2%               | 1.43                | 43%                     |
| 42      |         | 14.3%   | 10.9%  | 22.1%  | 12.7%  | -10.4% | 0.0%   | -12.7% | 1.9%   | 10.0%  | 4.7%  | 1.60               | 60%                 |                         |
| 44      |         | 0.7%    | 17.2%  | 4.8%   | 5.8%   | 1.4%   | -3.0%  | -5.5%  | -4.6%  | 11.3%  | 13.0% | 1.46               | 46%                 |                         |
| 45      |         | 0.0%    | 3.0%   | -4.9%  | 3.1%   | 0.9%   | -6.4%  | -6.9%  | -1.0%  | 4.9%   | 2.0%  | 0.94               | -6%                 |                         |
| 48      | -3.8%   | 21.8%   | -15.1% | 18.9%  | -13.3% | -2.8%  | -10.6% | -6.2%  | -4.0%  | 18.4%  | 0.95  | -5%                |                     |                         |
| 49      | 3.4%    | 2.4%    | -2.4%  | 11.7%  | 2.0%   | 3.9%   | -1.7%  | -4.5%  | 24.5%  | 18.2%  | 1.69  | 69%                |                     |                         |
| 50      | 16.9%   | 7.5%    | -25.0% | 4.8%   | -5.4%  | 6.0%   | -9.8%  | 5.3%   | -3.9%  | 21.7%  | 1.10  | 10%                |                     |                         |
| 51      | 0.0%    | 2.5%    | -31.7% | 2.9%   | 0.0%   | 1.0%   | -5.6%  | 1.3%   | 9.0%   | 6.8%   | 0.81  | -19%               |                     |                         |
| 52      | 3.4%    | 14.0%   | 1.6%   | 19.4%  | 10.1%  | 8.8%   | -4.8%  | -7.4%  | 23.2%  | 8.6%   | 2.02  | 102%               |                     |                         |
| 53      | 2.5%    | 15.0%   | 20.0%  | 8.5%   | -5.2%  | -1.8%  | -11.7% | 0.0%   | 4.3%   | -6.5%  | 1.23  | 23%                |                     |                         |
| 54      | 11.5%   | 3.8%    | -9.8%  | 3.7%   | 3.8%   | 3.0%   | -11.1% | -6.3%  | 5.0%   | 7.6%   | 1.09  | 9%                 |                     |                         |
| Average |         | 3.2%    | 12.8%  | -7.7%  | 9.3%   | -3.1%  | 0.2%   | -8.8%  | -3.1%  | 10.7%  | 7.8%  | Group A Avg<br>20% |                     |                         |
| STDEV   |         | 0.073   | 0.067  | 0.135  | 0.061  | 0.057  | 0.035  | 0.038  | 0.050  | 0.098  | 0.068 | Total Avg.<br>24%  |                     |                         |

## Return Statistics by Subject and Market

## Bet Statistics by Subject

| <b>SUBJ</b> | <b>mean bet size</b> | <b>sd betsize</b> | <b>zero bets</b> |
|-------------|----------------------|-------------------|------------------|
| 1           | 35%                  | 0.18              | 5%               |
| 2           | 58%                  | 0.28              | 1%               |
| 3           | 41%                  | 0.24              | 2%               |
| 4           | 50%                  | 0.20              | 0%               |
| 5           | 54%                  | 0.28              | 4%               |
| 6           | 64%                  | 0.12              | 0%               |
| 7           | 38%                  | 0.20              | 1%               |
| 8           | 43%                  | 0.28              | 17%              |
| 9           | 30%                  | 0.22              | 22%              |
| 10          | 18%                  | 0.16              | 14%              |
| 11          | 20%                  | 0.28              | 42%              |
| 12          | 45%                  | 0.48              | 51%              |
| 13          | 85%                  | 0.13              | 0%               |
| 14          | 29%                  | 0.30              | 32%              |
| 15          | 51%                  | 0.28              | 2%               |
| 16          | 7%                   | 0.06              | 39%              |
| 17          | 54%                  | 0.38              | 19%              |
| 18          | 43%                  | 0.34              | 14%              |
| 19          | 51%                  | 0.24              | 0%               |
| 20          | 87%                  | 0.30              | 5%               |
| 21          | 46%                  | 0.41              | 13%              |
| 22          | 67%                  | 0.13              | 0%               |
| 23          | 66%                  | 0.37              | 15%              |
| 24          | 28%                  | 0.32              | 31%              |
| 25          | 45%                  | 0.24              | 10%              |
| 26          | 47%                  | 0.28              | 6%               |
| 27          | 48%                  | 0.35              | 14%              |
| 28          | 53%                  | 0.10              | 0%               |
| 29          | 42%                  | 0.23              | 8%               |
| 30          | 43%                  | 0.15              | 1%               |
| 31          | 26%                  | 0.22              | 18%              |
| 32          | 60%                  | 0.19              | 1%               |
| 33          | 41%                  | 0.23              | 8%               |
| 34          | 37%                  | 0.32              | 34%              |
| 35          | 56%                  | 0.28              | 4%               |
| 36          | 38%                  | 0.28              | 6%               |
| 37          | 43%                  | 0.37              | 24%              |
| 38          | 56%                  | 0.30              | 5%               |
| 39          | 49%                  | 0.18              | 0%               |
| 40          | 47%                  | 0.16              | 3%               |
| 41          | 19%                  | 0.06              | 1%               |
| 42          | 46%                  | 0.46              | 42%              |
| 43          | 27%                  | 0.20              | 13%              |
| 44          | 36%                  | 0.19              | 6%               |
| 45          | 24%                  | 0.17              | 13%              |
| 46          | 60%                  | 0.12              | 0%               |
| 47          | 37%                  | 0.29              | 20%              |
| 48          | 67%                  | 0.34              | 12%              |
| 49          | 32%                  | 0.24              | 5%               |
| 50          | 58%                  | 0.46              | 36%              |
| 51          | 28%                  | 0.24              | 20%              |
| 52          | 34%                  | 0.31              | 27%              |
| 53          | 56%                  | 0.19              | 0%               |
| 54          | 26%                  | 0.23              | 20%              |
