# Supplementary material
Source: PubMed Central journal article supplement (PMC1890522)

**S&P500 1987**

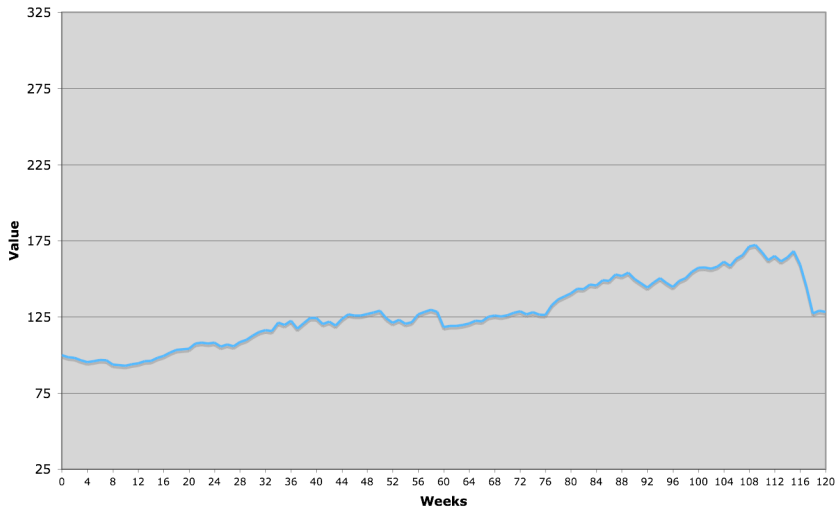

**Nikkei 1986**

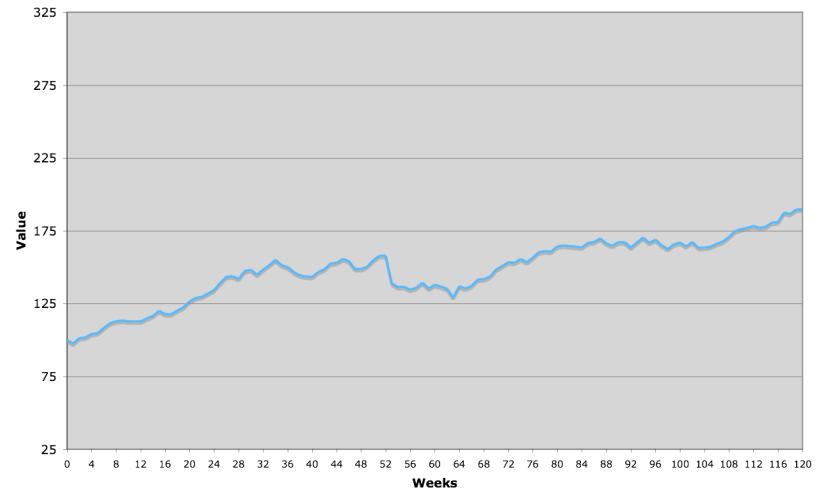

**Bovespa 1997**

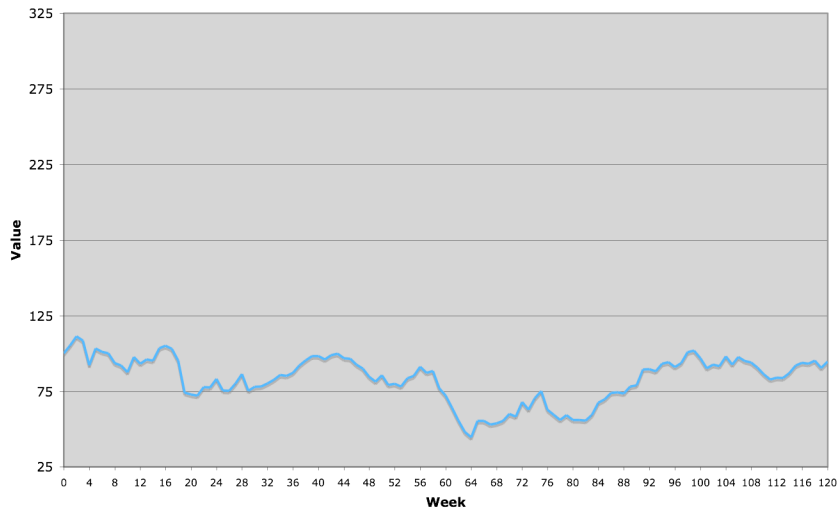

**S&P500 1990**

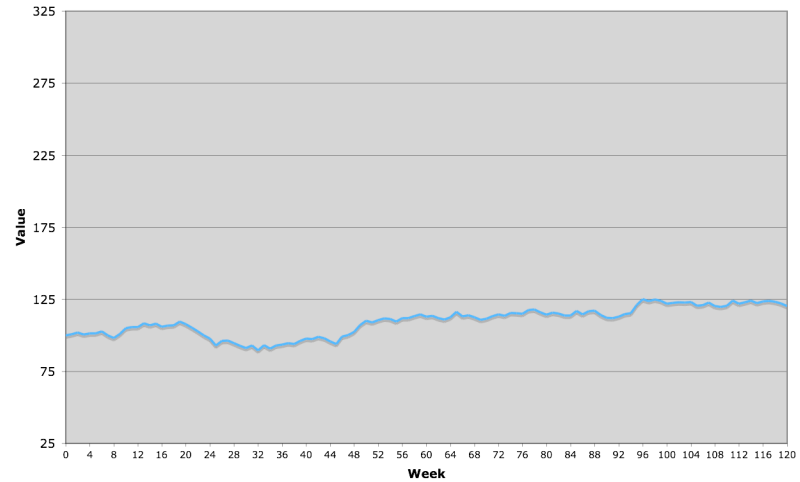

**Dow 2001**

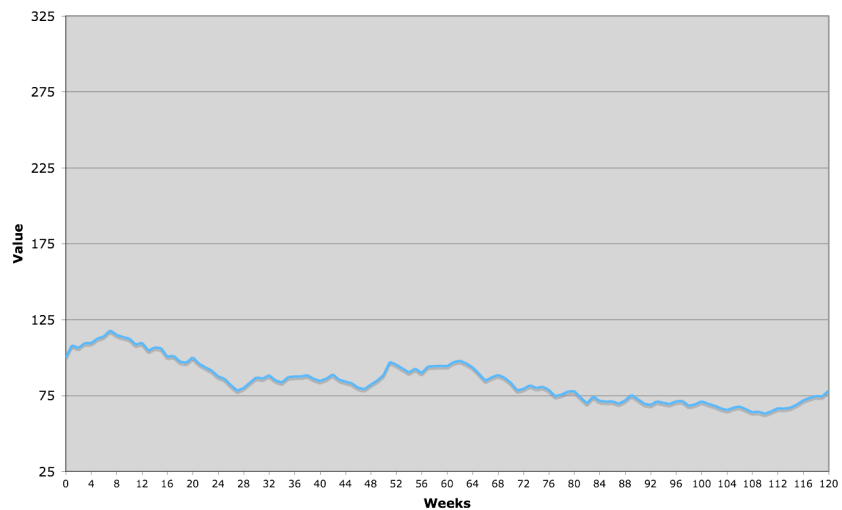

**Yen/\$ 2001**

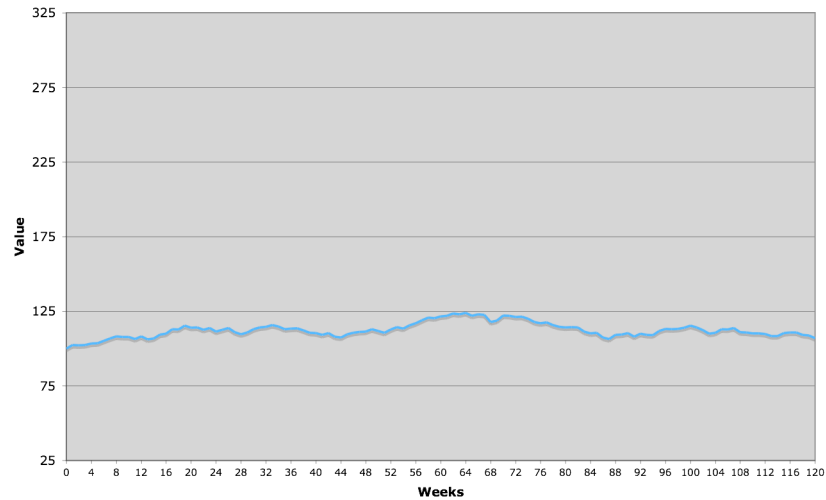

**Euro/\$ 1999**

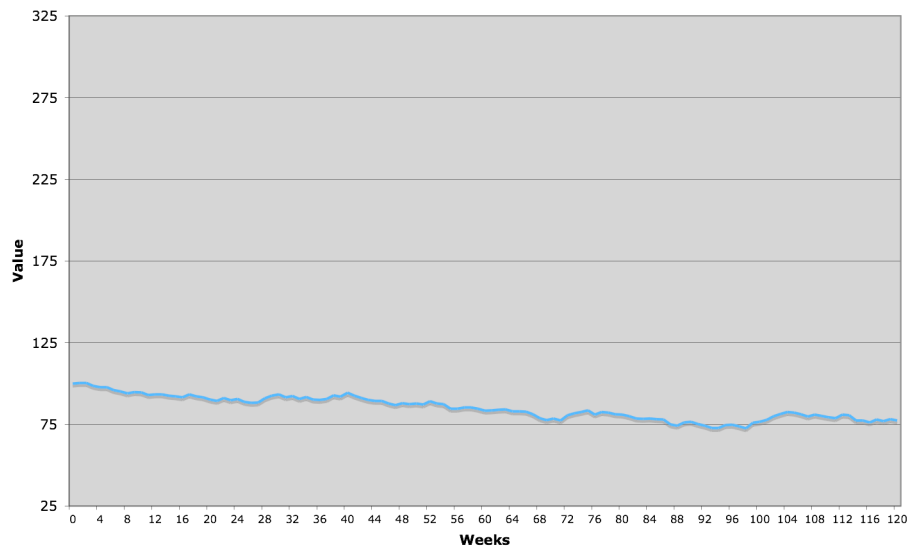

**Yen/\$ 1996**

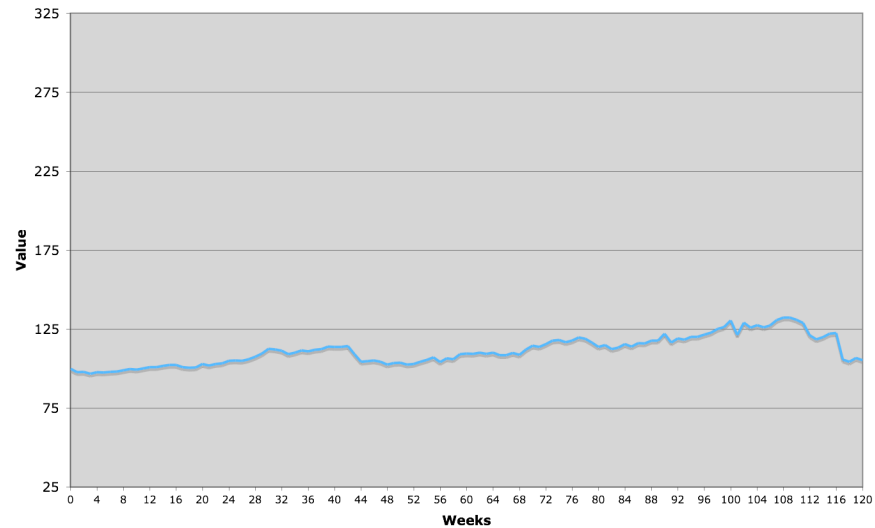

**HangSeng 1996**

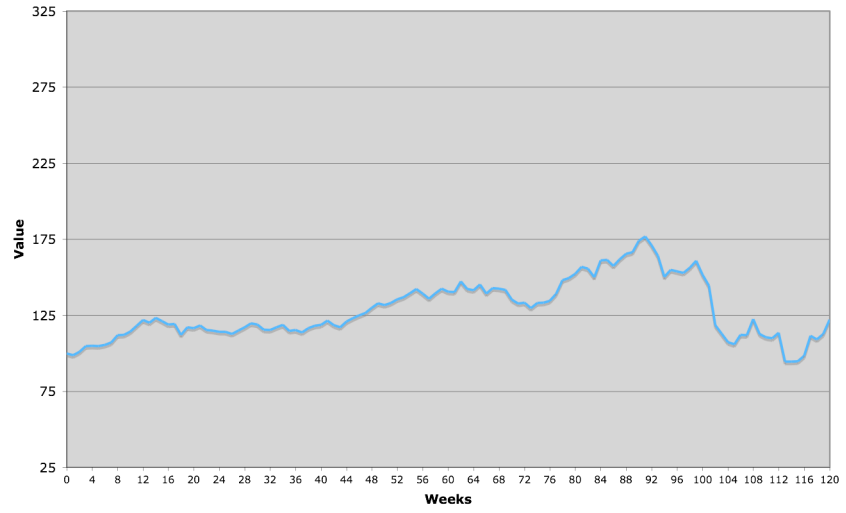

**10yr 1993**

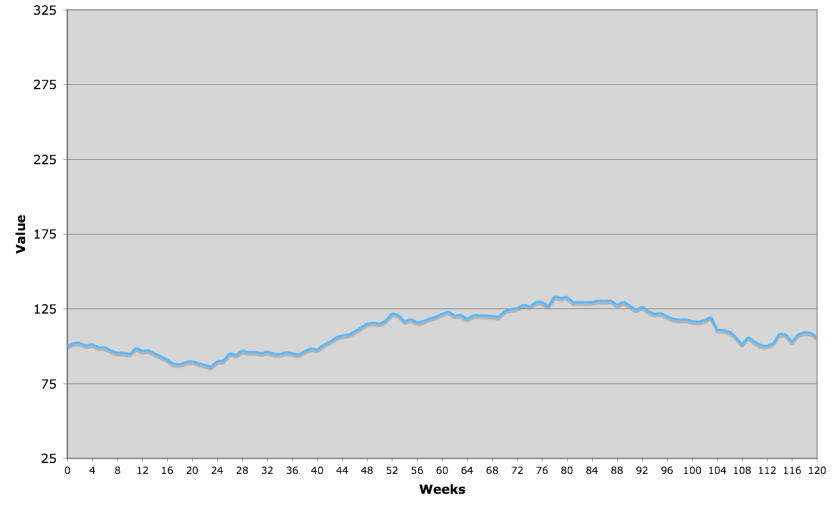

**10yr 1998**

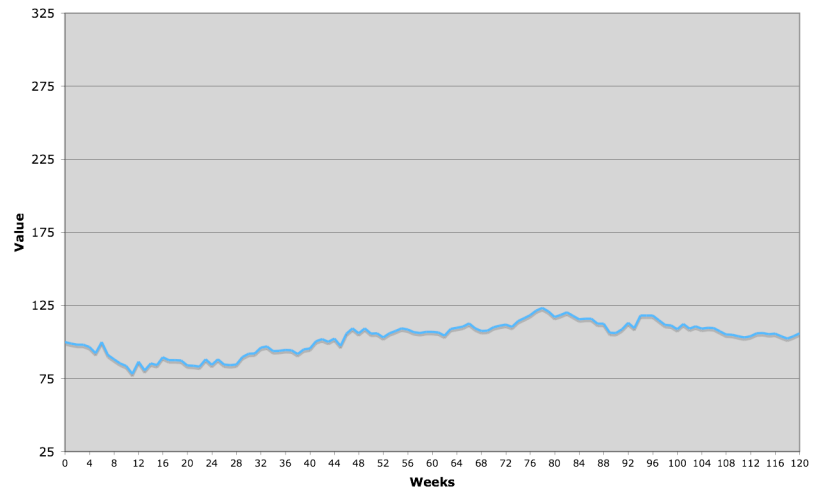

**DOW 1929**

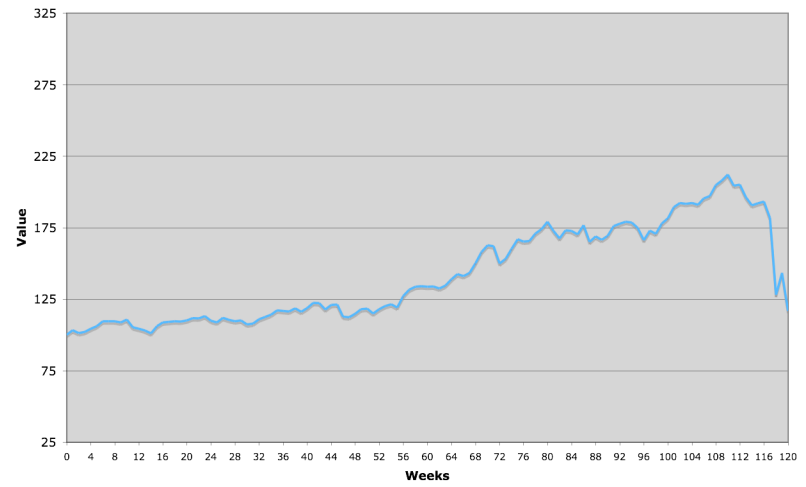

**Nikkei 1990**

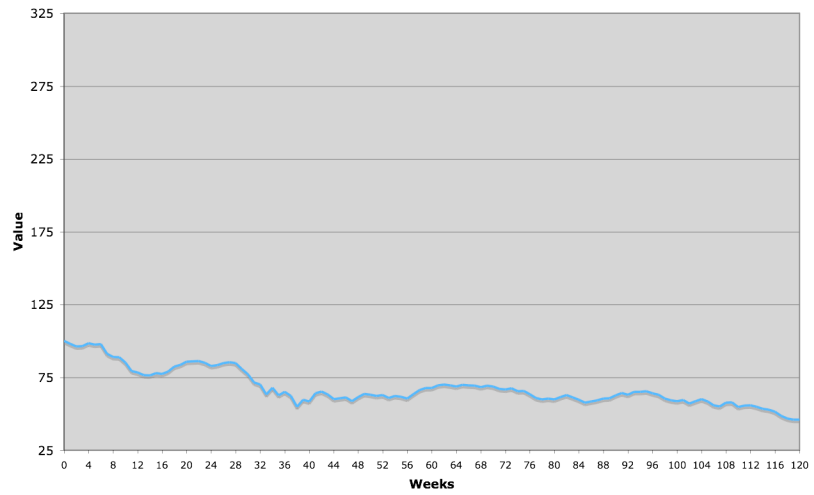

**Dow 1971**

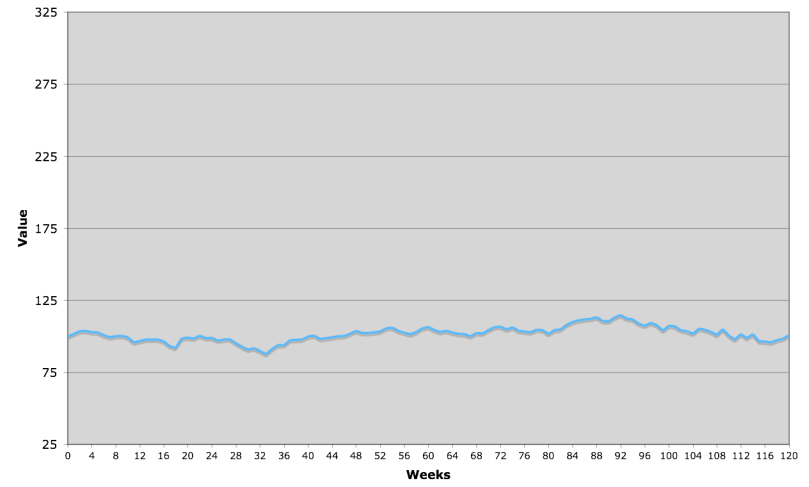

**DM/\$ 1993**

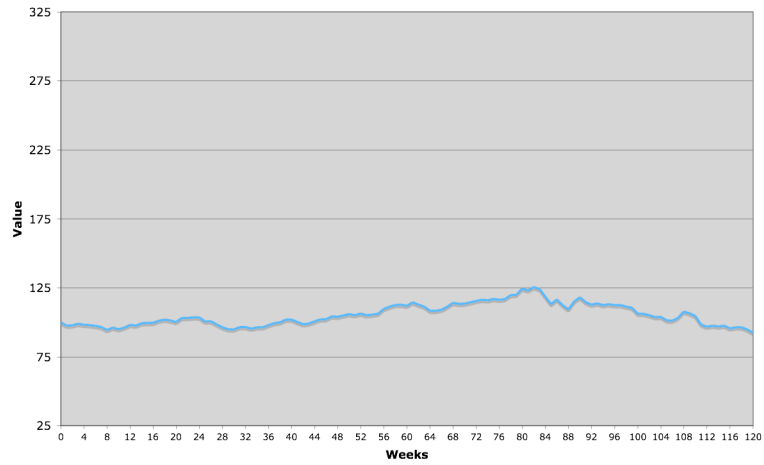

**NASDAQ 1998**

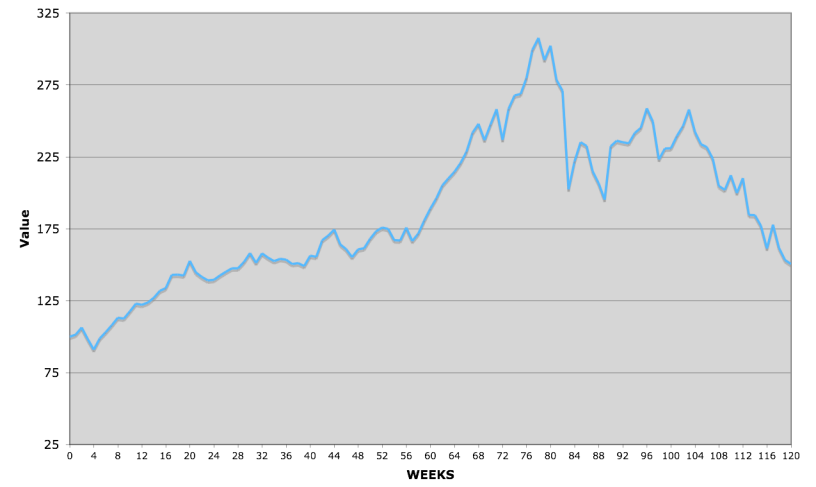

**Yen/\$ 1990**

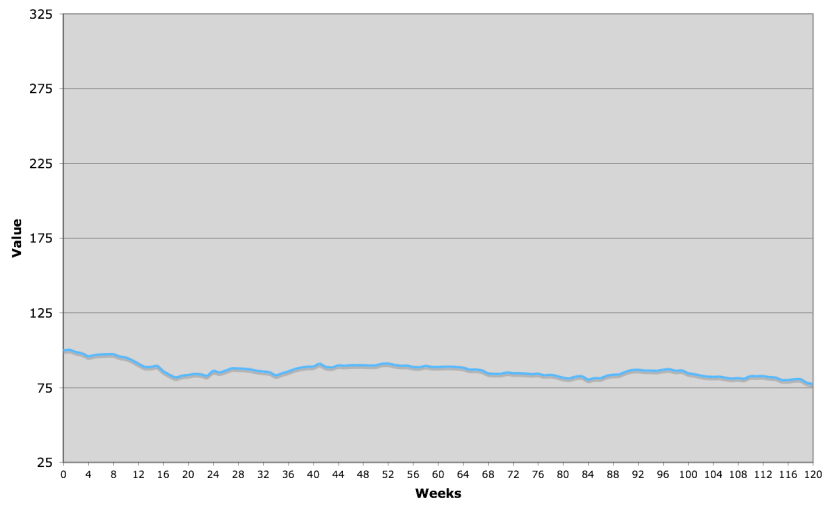

**S&P500 2001**

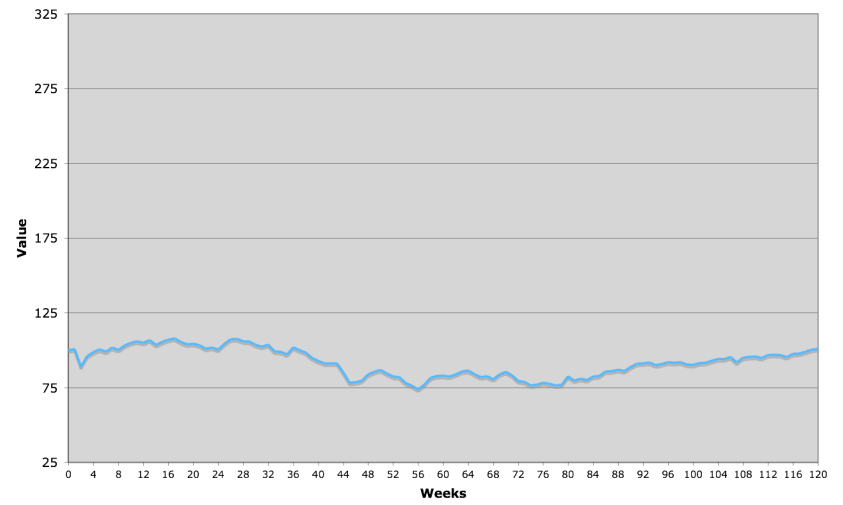

**\$/Euro 2001**

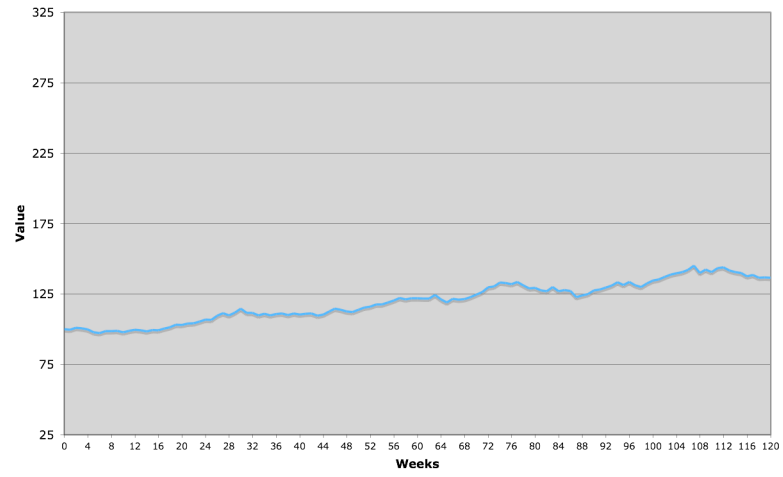

**HangSeng 1993**

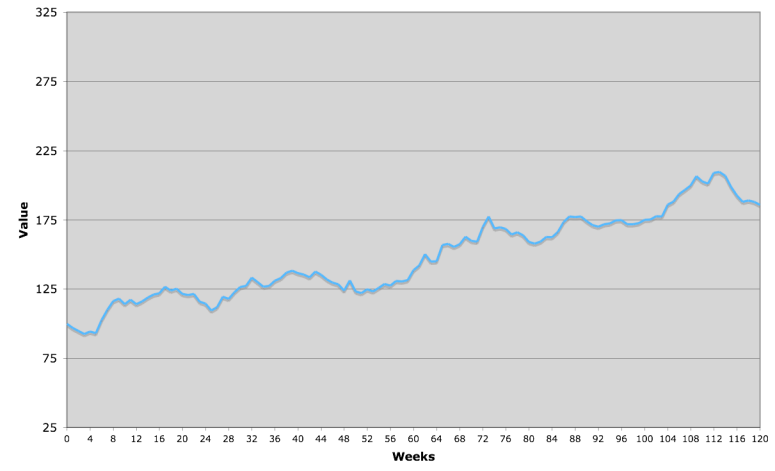

Supplement: pnas_0608842104_1.pdf [file pnas_0608842104_1.pdf]

**Normalized DBET versus Fictive Error**

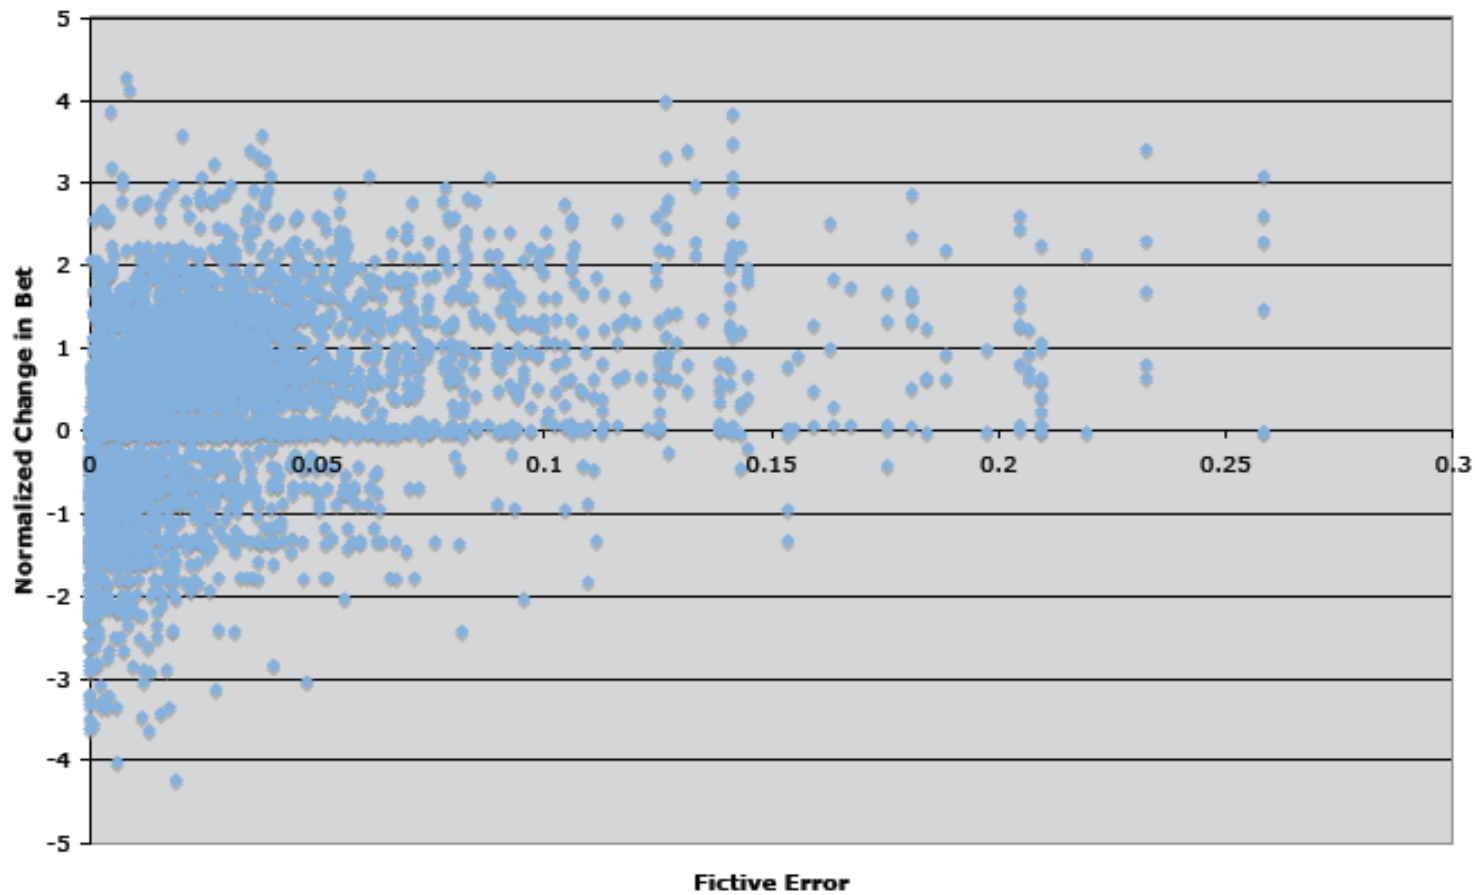

Supplement: pnas_0608842104_2.pdf [file pnas_0608842104_2.pdf]

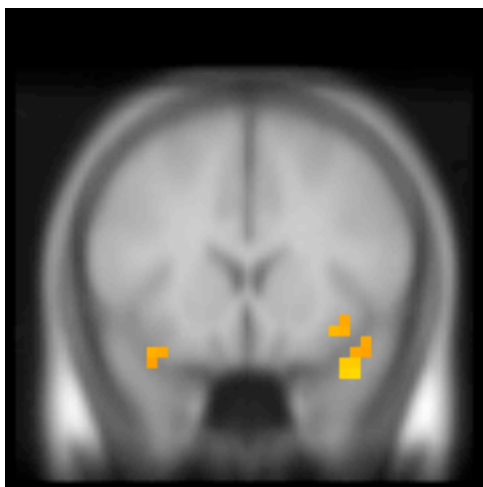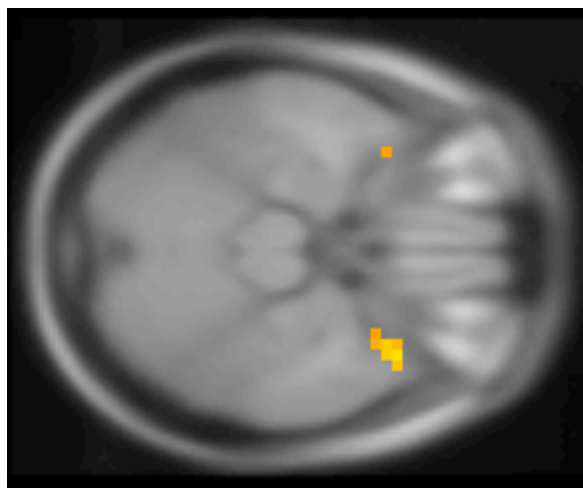

Supplement: pnas_0608842104_3.pdf [file pnas_0608842104_3.pdf]
